# Supplementary material
Source: PubMed Central journal article supplement (PMC10121453)
Supplement: mmc1.pdf [file mmc1.pdf]

iScience, Volume 26

## **Supplemental information**

### **Adipocyte-derived chemerin rescues lipid overload-induced cardiac dysfunction**

**Ruimin Liu, Yinying Han, Chenglong Huang, Mengqian Hou, Rui Cheng, Shujin Wang, Xi Li, and Jie Tian**

**Table S1. Antibodies used in this paper, Related to Figure 1, 4, 5, 6.**

| <b>Antibody</b> | <b>Company</b>            | <b>Cat number</b> |
|-----------------|---------------------------|-------------------|
| Chemerin        | Santa Cruz Technology     | sc-373797         |
| CMKLR1          | Abcepta                   | AP50620           |
| HSP90           | Cell Signaling Technology | 4877s             |
| PPAR $\gamma$   | Cell Signaling Technology | 2443S             |
| p-P38           | Cell Signaling Technology | 4511S             |
| P38             | Cell Signaling Technology | 9212S             |
| p-P65           | Cell Signaling Technology | 3033S             |
| P65             | Cell Signaling Technology | 8242S             |
| p-Akt           | Cell Signaling Technology | 4058S             |
| Akt             | Cell Signaling Technology | 9272S             |

**Table S2. Primers for qRT-PCR, Related to Figure 5, 6.**

| <b>Primers</b>                 | <b>Sequence (5'-3')</b> |                         |
|--------------------------------|-------------------------|-------------------------|
| <i>Rarres2</i>                 | Forward                 | GCCTGGCCTGCATTAATAATGG  |
|                                | Reverse                 | CTTGCTTCAGAATTGGGCAGT   |
| <i>Cmklr1</i>                  | Forward                 | GCCAACATACACGATGTTCGC   |
|                                | Reverse                 | GGATGTTGGGGTGTAGTGGG    |
| <i>18s</i>                     | Forward                 | CGCCGCTAGAGGTGAAATTCT   |
|                                | Reverse                 | CATTCTTGGCAAATGCTTTTCG  |
| <i>ACC</i>                     | Forward                 | CACCAGTTTTGCATTGAGAAC   |
|                                | Reverse                 | TACGCTGTTGAGTTCATAGGC   |
| <i>SREBP-1c</i>                | Forward                 | AGGGCAATGAGGTCACATCC    |
|                                | Reverse                 | GCAAGAAGCGGATGTAGTCCG   |
| <i>PPAR<math>\gamma</math></i> | Forward                 | AGAACCTGCATCTCCACCTTA   |
|                                | Reverse                 | CCCACAGACTCGGCACTCAAT   |
| <i>LXR<math>\alpha</math></i>  | Forward                 | GCCTCAATGCCTGATGTTTCTC  |
|                                | Reverse                 | GCTGACTCCAACCCTATCCCTAA |
| <i>DGAT1</i>                   | Forward                 | GTTTCCGTCCAGGGTGGTAGT   |
|                                | Reverse                 | TGGCACCTCAGATCCCAGTAG   |
| <i>DGAT2</i>                   | Forward                 | GCCTGGGTGCCTTCTGTAA     |
|                                | Reverse                 | AGTCTATGGTGTCTCGGTTGA   |
| <i>PPAR<math>\alpha</math></i> | Forward                 | ACAAGTGCCTGTCTGTCCG     |

|                                |         |                         |
|--------------------------------|---------|-------------------------|
|                                | Reverse | TCAGGTAGGCTTCGTGGAT     |
| <i>CPT1</i>                    | Forward | GTGTCCAAGTATCTGGCAGTC   |
|                                | Reverse | TCAGGGTATTTCTCAAAGTCAA  |
| <i>LACD</i>                    | Forward | AGCCTCCACTCAGATATTGTCA  |
|                                | Reverse | TGGCGTTCGTTCTTACTCCTTGT |
| <i>CD36</i>                    | Forward | TGGTCAAGCCAGCTAGAAA     |
|                                | Reverse | TCCAAGTAAGGCCATCTC      |
| <i>TNF-<math>\alpha</math></i> | Forward | CGTCGTAGCAAACCACCAA     |
|                                | Reverse | GGCAGCCTTGTCCTTGA       |
| <i>IL-1<math>\beta</math></i>  | Forward | GCTGCTTCCAAACCTTTGACC   |
|                                | Reverse | GAGTGATACTGCCTGCCTGAA   |
| <i>IL-6</i>                    | Forward | GACAACCACGGCCTTCCCTAC   |
|                                | Reverse | TCATTTCCACGATTTCCAGA    |

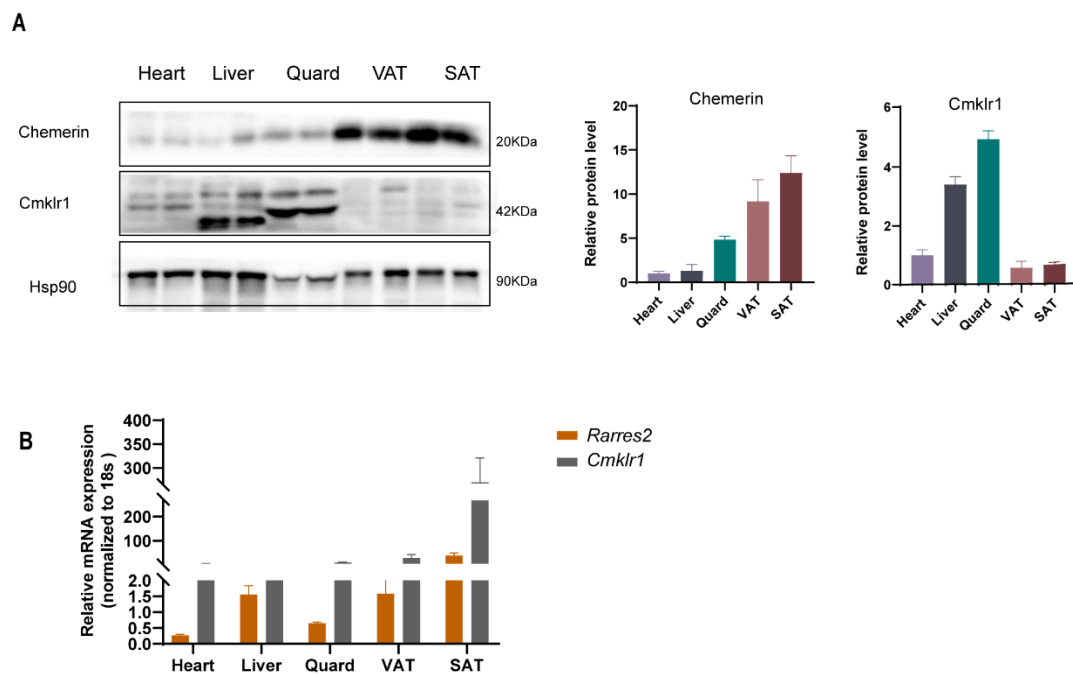

**Figure S1. The expression of chemerin and its receptor in various organs of mice under high-fat feeding, Related to Figure 1**

Chemerin and Cmk1r1 expression was detected in different tissues in WT mice under HFD 20

weeks **(A)** Western blots and its quantification of Chemerin, Cmk1r1 in the heart, liver, skeletal muscle, and adipose tissue lysates. The HSP90 was used as a loading control (n=3). **(B)** mRNA level of chemerin (*Rarres2*) and *CMKLR1* were detected by RT-qPCR in HFD WT mice.
